# Supplementary material
Source: publisher site journal article supplement (https://www.dovepress.com/get_supplementary_file.php?f=342922.xlsx)
Supplement: Supplementary file 1 [file get_supplementary_file.php]

## Sheet: Feuil1
Supplementary material
Treatment				PCBO						CAF
ROI				Parieto-Occipital		Centro-temporal		Frontal		Parieto-Occipital		Centro-temporal		Frontal
Day				D1	D2	D1	D2	D1	D2	D1	D2	D1	D2	D1	D2
PVT (x105 µV2)	χ²	df	p
Mean Alpha ± S.E.M	80.9	11	< .001	11.7 ± 3.76	14.9 ± 4.3	6.27 ± 1.34	8.51 ± 1.68	6.38 ± 1.32	7.17 ± 1.44	10.1 ± 3.05	10.7 ± 2.9	5.53 ± 1.54	7.94 ± 2.23	5.09 ± 1.33	6.06 ± 1.37
Mean Beta ± S.E.M	60.1	11	< .001	3.13 ± 0.44	3.86 ± 0.57	2.51 ± 0.42	3.1 ± 0.42	2.31 ± 0.32	2.57 ± 0.31	2.8 ± 0.28	3.05 ± 0.39	2.15 ± 0.31	3.77 ± 1.22	1.63 ± 0.16	2.37 ± 0.26
Go/noGo (x105 µV2)	χ²	df	p
Mean Alpha ± S.E.M	92.3	11	< .001	8.63 ± 2.06	11.3 ± 2.8	5.16 ± 0.97	6.98 ± 1.26	5.11 ± 0.88	5.86 ± 1.04	7.13 ± 1.38	7.73 ± 1.89	4.23 ± 0.88	5.9 ± 1.54	3.99 ± 0.75	4.78 ± 0.98
Mean Beta ± S.E.M	45.2	11	< .001	3.0 ± 0.36	3.6 ± 0.56	2.54 ± 0.41	3.01 ± 0.43	2.31 ± 0.29	2.46 ± 0.37	2.81 ± 0.27	2.81 ± 0.33	2.07 ± 0.29	2.65 ± 0.36	1.67 ± 0.17	2.17 ± 0.19
2n-Back (x105 µV2)	χ²	df	p
Mean Alpha ± S.E.M	80.4	11	< .001	8.75 ± 2.2	10.8 ± 2.72	4.92 ± 0.95	6.82 ± 1.28	5.09 ± 1.02	5.62 ± 1.05	7.29 ± 1.7	7.51 ± 1.76	4.23 ± 0.94	5.35 ± 1.34	3.99 ± 0.87	4.62 ± 0.97
Mean Beta ± S.E.M	47.6	11	< .001	2.81 ± 0.35	3.57 ± 0.52	2.2 ± 0.25	2.77 ± 0.36	1.98 ± 0.23	2.27 ± 0.3	2.56 ± 0.24	2.61 ± 0.28	1.86 ± 0.25	2.28 ± 0.29	1.57 ± 0.14	1.94 ± 0.18
Table S1 Global effects of total sleep deprivation (day effect, D2 vs D1), treatment (CAF vs PCBO) and region of interest (ROIs: Parieto-Occipital, Centro-Temporal, Frontal) on EEG alpha and beta power during the 3 cognitive tasks A Friedman’s ANOVA analysis was performed for EEG alpha and beta power during PVT, Go-NoGo and 2-NBack, assessing a global effect of total sleep deprivation, treatment …
